# Supplementary material for: Assessment and referral in suspected COVID-19: a community based observational study
Source: Research Square preprint supplement (doi:10.21203/rs.3.rs-211154/v1), 2021-02-19
Supplement: Supplementary file 1 [file 3230fd5a20accacdbf08aedc.docx]

Assessment and referral in suspected COVID-19: a community based observational study

S Finnikin, S Haroon, J Cooper, A Anand, A Pakiyaraja, B Duncombe, D Lasserson

*Additional file 3: Participant characteristics, stratified by referral status*

|  |  | **Referred** | | | | **Total** | |  |
| --- | --- | --- | --- | --- | --- | --- | --- | --- |
|  |  | **Yes (n=95)** | | **No (n=586)** | | **(n=681)** | |  |
|  |  | **N** | **(%)** | **N** | **(%)** | **N** | **(%)** | **P**** |
| Age (years) | 16-29 | 9 | (9.5) | 93 | (15.9) | 102 | (15.0) | **0.001** |
| 30-44 | 14 | (14.7) | 145 | (24.7) | 159 | (23.4) |
| 45-59 | 32 | (33.7) | 174 | (29.7) | 206 | (30.3) |
| 60-74 | 25 | (26.3) | 131 | (22.4) | 156 | (22.9) |
| 75+ | 15 | (15.8) | 43 | (7.3) | 58 | (8.5) |
| Sex | Female | 64 | (67.4) | 377 | (64.3) | 441 | (64.8) | 0.609 |
| Male | 31 | (32.6) | 206 | (35.2) | 237 | (34.8) |
| Missing | 0 | - | 3 | (0.5) | 3 | (0.4) |
| Townsend quintile  (1st=lowest deprivation) | 1st | 9 | (9.5) | 49 | (8.4) | 58 | (8.5) | 0.236 |
| 2nd | 9 | (9.5) | 67 | (11.4) | 76 | (11.2) |
| 3rd | 12 | (12.6) | 109 | (18.6) | 121 | (17.8) |
| 4th | 20 | (21.1) | 132 | (22.5) | 152 | (22.3) |
| 5th | 42 | (44.2) | 206 | (35.2) | 248 | (36.4) |
| Missing | 3 | (3.2) | 23 | (3.9) | 26 | (3.8) |
| Referral symptoms | Fever | 46 | (48.4) | 242 | (41.3) | 288 | (42.3) | 0.1923 |
| Cough | 52 | (54.7) | 399 | (68.1) | 451 | (66.2) | 0.0107 |
| Dyspnoea | 64 | (67.4) | 351 | (59.9) | 415 | (60.9) | 0.1662 |
| Confusion | 2 | (2.1) | 4 | (0.7) | 6 | (0.9) | 0.1687 |
| Risk factors | High risk* | 10 | (10.5) | 31 | (5.3) | 41 | (6.0) | 0.0466 |
| Cardiovascular disease | 8 | (8.4) | 42 | (7.2) | 50 | (7.3) | 0.6638 |
| Diabetes | 11 | (11.6) | 40 | (6.8) | 51 | (7.5) | 0.1025 |
| COPD | 17 | (17.9) | 99 | (16.9) | 116 | (17.0) | 0.8098 |
| BMI >30 | 10 | (10.5) | 66 | (11.3) | 76 | (11.2) | 0.8325 |
| Observations | Pulse rate >90 bpm | 45 | (47.4) | 198 | (33.8) | 243 | (35.7) | 0.0104 |
| Temperature >37.8 | 23 | (24.2) | 44 | (7.5) | 67 | (9.8) | **<0.001** |
| Respiratory rate >20 | 42 | (44.2) | 123 | (21.0) | 165 | (24.2) | **<0.001** |
| Oxygen saturation <96% | 25 | (26.3) | 61 | (10.4) | 86 | (12.6) | **<0.001** |
| SBP <110 mmHg | 22 | (23.2) | 109 | (18.6) | 131 | (19.2) | 0.2959 |
| NEWS2 | 0 | 20 | (21.1) | 258 | (44.0) | 278 | (40.8) | **<0.001** |
| 1 | 16 | (16.8) | 155 | (26.5) | 171 | (25.1) |
| 2 | 18 | (19.0) | 74 | (12.6) | 92 | (13.5) |
| 3 | 12 | (12.6) | 34 | (5.8) | 46 | (6.8) |
| 4 | 6 | (6.3) | 17 | (2.9) | 23 | (3.4) |
| 5+ | 11 | (11.6) | 10 | (1.7) | 21 | (3.1) |
| Missing | 12 | (12.6) | 38 | (6.5) | 50 | (7.3) |
| Severity *** | Mild | 35 | (36.8) | 366 | (62.5) | 401 | (58.9) | 0.169 |
| Moderate | 44 | (46.3) | 197 | (33.6) | 241 | (35.4) |
| Severe | 16 | (16.8) | 23 | (3.9) | 39 | (5.7) |
| Re-attendance |  | 0 | - | 7 | (1.2) | 7 | (1.03) | - |

BMI=body mass index, COPD=chronic obstructive pulmonary disease, NEWS2=National Early Warning Score 2, SBP=Systolic Blood Pressure

*Deemed by referring clinician to be at high clinical risk

**Threshold for statistical significance corrected to 0.002 using the Bonferroni correction

***Severity graded according to NHSE algorithm
